# Supplementary material
Source: Springer Nature journal article supplement (https://www.springermedizin.de/resource/supplementary/12943_2014_1352_MOESM6_ESM.pdf/9552764)

**A**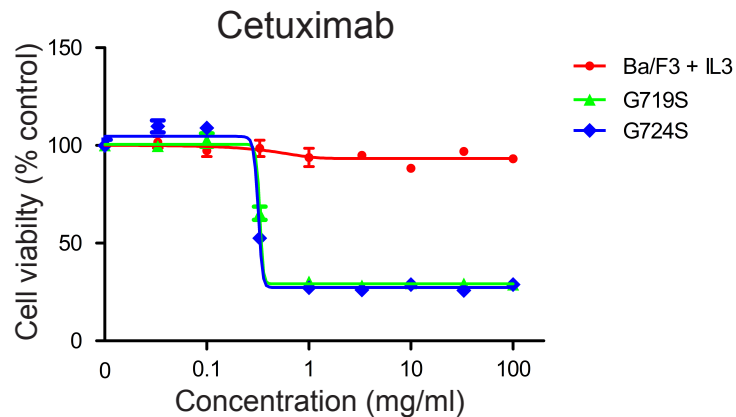**B**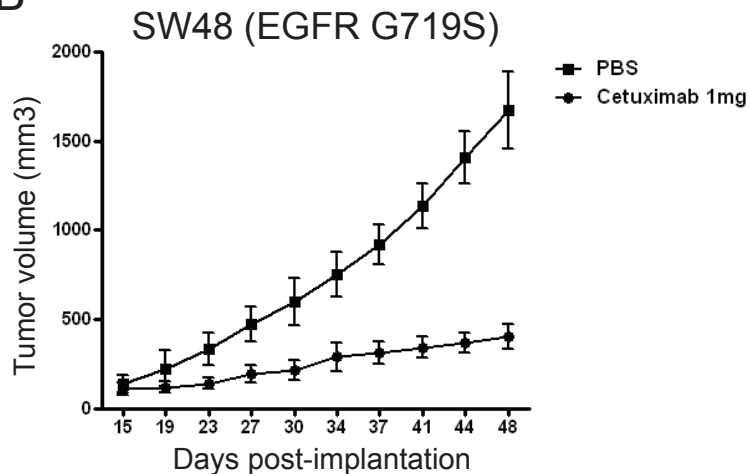**C**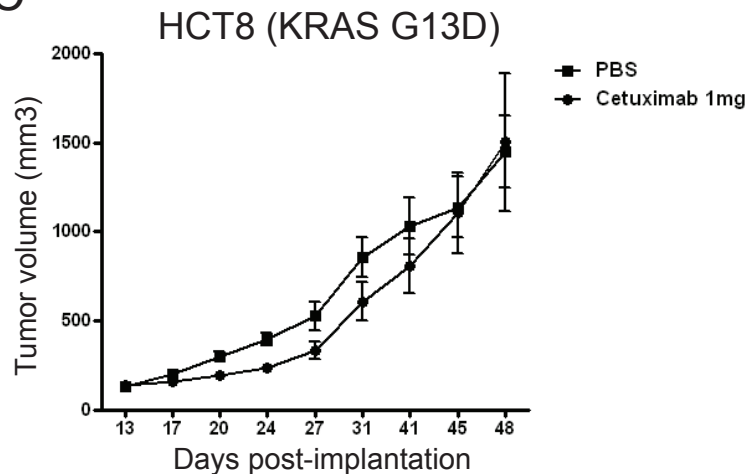

Supplement: MOESM6 [file 9552764]
